# Supplementary material
Source: Springer Nature journal article supplement (https://www.springermedizin.de/resource/supplementary/13075_2013_4254_MOESM3_ESM.pdf/9696202)

**A Spontaneous pain (Day 15)**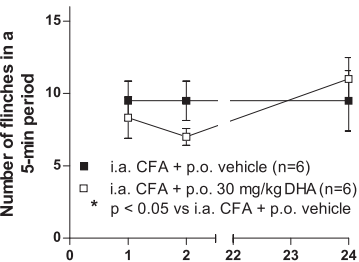**B Horizontal exploratory activity (Day 15)**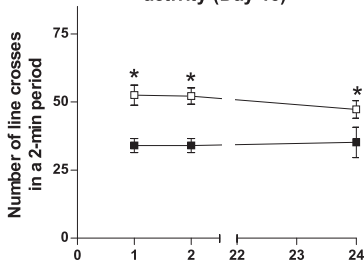**C Vertical rearing (Day 15)**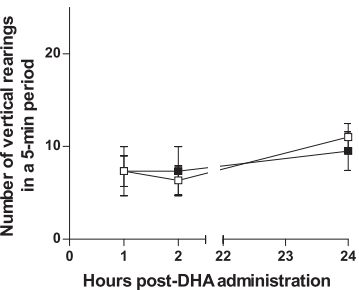**D Knee edema (Day 15)**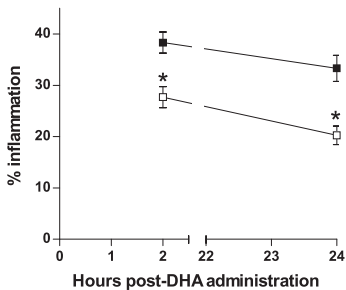

Supplement: MOESM3 [file 9696202]
